# Supplementary material for: Environmental Influences Measured by Epigenetic Clock and Vulnerability Components at Birth Impact Clinical ASD Heterogeneity
Source: MDPI journal article supplement (doi:10.3390/genes12091433), 2021-09-17
Supplement: s1 [file s1]

Table S1: Score of environmental factors and familial genetic history

| ID   | GestDisease | MatStress | MatSchool | SocialClass | GenetFH |
|------|-------------|-----------|-----------|-------------|---------|
| ID01 | 1           | 0         | 2         | 0           | 10      |
| ID02 | 1           | 3         | 6         | 0           | 12      |
| ID04 | 1           | 2         | 4         | 1           | 6       |
| ID05 | 0           | 2         | 3         | 0           | 9       |
| ID07 | 0           | 1         | 3         | 0           | 8       |
| ID08 | 1           | 0         | 3         | 0           | 0       |
| ID09 | 0           | 0         | 3         | 0           | 6       |
| ID10 | 0           | 5         | 3         | 1           | 9       |
| ID11 | 0           | 1         | 6         | 0           | 0       |
| ID12 | 1           | 0         | 3         | 0           | 0       |
| ID14 | 3           | 2         | 3         | 1           | 0       |
| ID15 | 1           | 0         | 3         | 0           | 0       |
| ID16 | 1           | 0         | 3         | 0           | 0       |
| ID17 | 1           | 0         | 3         | 0           | 8       |
| ID19 | 1           | 0         | 1         | 0           | 0       |
| ID20 | 1           | 1         | 6         | 2           | 3       |
| ID21 | 0           | 1         | 1         | 0           | 12      |
| ID22 | 1           | 3         | 4         | 2           | 3       |
| ID23 | 0           | 3         | 1         | 1           | 18      |
| ID24 | 0           | 0         | 3         | 2           | 6       |
| ID25 | 0           | 0         | 3         | 1           | 0       |
| ID26 | 1           | 0         | 3         | 1           | 4       |
| ID27 | 0           | 0         | 3         | 0           | 0       |
| ID28 | 1           | 0         | 3         | 0           | 10      |
| ID29 | 2           | 0         | 1         | 1           | 0       |
| ID30 | 0           | 0         | 3         | 0           | 0       |
| ID31 | 0           | 0         | 3         | 2           | 1       |
| ID32 | 0           | 0         | 3         | 0           | 11      |
| ID33 | 0           | 0         | 3         | 1           | 6       |
| ID34 | 0           | 3         | 6         | 2           | 9       |
| ID35 | 1           | 1         | 4         | 0           | 6       |
| ID36 | 0           | 0         | 1         | 0           | 6       |
| ID37 | 1           | 0         | 1         | 0           | 6       |
| ID38 | 1           | 0         | 1         | 0           | 4       |
| ID39 | 1           | 1         | 3         | 0           | 16      |
| ID42 | 0           | 1         | 3         | 2           | 6       |
| ID43 | 1           | 0         | 1         | 1           | 12      |
| ID46 | 0           | 0         | 2         | 0           | 12      |
| ID47 | 0           | 1         | 5         | 1           | 13      |
| ID48 | 3           | 1         | 1         | 0           | 6       |
| ID49 | 0           | 4         | 3         | 2           | 0       |
| ID50 | 1           | 0         | 1         | 0           | 5       |
| ID51 | 0           | 0         | 1         | 0           | 7       |
| ID52 | 1           | 2         | 4         | 1           | 0       |
| ID53 | 2           | 0         | 3         | 0           | 0       |
| ID54 | 1           | 0         | 3         | 1           | 0       |
| ID56 | 1           | 0         | 1         | 0           | 2       |
| ID57 | 1           | 0         | 1         | 0           | 0       |
| ID58 | 0           | 3         | 1         | 0           | 9       |
| ID59 | 0           | 1         | 1         | 0           | 12      |
| ID60 | 0           | 3         | 3         | 1           | 6       |
| ID61 | 2           | 4         | 3         | 0           | 6       |
| ID62 | 1           | 0         | 5         | 0           | 10      |
| ID63 | 1           | 2         | 1         | 0           | 3       |
| ID64 | 2           | 3         | 3         | 1           | 0       |

|      |   |   |   |   |   |
|------|---|---|---|---|---|
| ID65 | 2 | 1 | 3 | 1 | 0 |
| ID66 | 1 | 2 | 1 | 0 | 0 |
| ID68 | 2 | 3 | 3 | 1 | 0 |
| ID69 | 0 | 4 | 6 | 2 | 0 |
| ID71 | 0 | 0 | 3 | 1 | 0 |
| ID72 | 2 | 0 | 2 | 0 | 6 |
| ID73 | 0 | 0 | 3 | 0 | 2 |
| ID74 | 0 | 0 | 3 | 1 | 0 |
| ID75 | 1 | 0 | 1 | 0 | 4 |
| ID77 | 0 | 2 | 3 | 1 | 0 |
| ID78 | 2 | 4 | 3 | 2 | 2 |
| ID80 | 1 | 1 | 3 | 2 | 3 |
