# Supplementary material for: Environmental Influences Measured by Epigenetic Clock and Vulnerability Components at Birth Impact Clinical ASD Heterogeneity
Source: MDPI journal article supplement (doi:10.3390/genes12091433), 2021-09-17
Supplement: s1 [file s1]

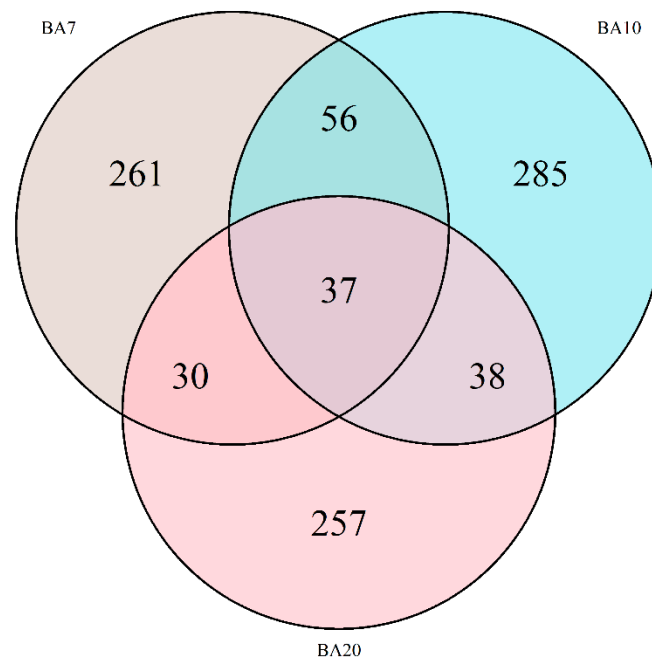

**Figure S1. Venn Diagram of correspondence analysis of DNA methylation between blood and brain.** Each circle represents a Broadman Area of the brain. The number of CpGs is defined as an overlapping of DMPs identified and children methylome and correlation  $|r| \geq 0.5$  between blood and the respective brain area in BECon datasets.
