# Supplementary material for: Environmental Influences Measured by Epigenetic Clock and Vulnerability Components at Birth Impact Clinical ASD Heterogeneity
Source: MDPI journal article supplement (doi:10.3390/genes12091433), 2021-09-17
Supplement: s1 [file s1]

Table S3: Type of rVarBase elements in DMPs

| Type*           | group B | group A | Expected B<br>(B vs A) | Expected A<br>(B vs A) | p-value<br>(B vs A) | Expected B<br>(B vs Bck) | p-value<br>(B vs bck) | Expected A<br>(A vs Bck) |
|-----------------|---------|---------|------------------------|------------------------|---------------------|--------------------------|-----------------------|--------------------------|
| TssA            | 604     | 532     | 622                    | 514                    | 2.80E-01            | 552                      | 2.10E-02              | 457                      |
| TssAFlnk        | 805     | 664     | 804                    | 665                    | 9.70E-01            | 735                      | <b>6.40E-03</b>       | 608                      |
| TxFlnk          | 455     | 189     | 352                    | 292                    | <b>9.40E-17</b>     | 365                      | <b>1.10E-06</b>       | 299                      |
| Tx              | 533     | 338     | 477                    | 394                    | <b>7.70E-05</b>     | 603                      | <b>2.80E-03</b>       | 498                      |
| TxWk            | 1281    | 936     | 1213                   | 1004                   | <b>1.40E-03</b>     | 1321                     | 2.20E-01              | 1092                     |
| EnhG            | 525     | 348     | 478                    | 395                    | <b>9.50E-04</b>     | 553                      | 2.20E-01              | 457                      |
| Enh             | 1085    | 918     | 1096                   | 907                    | 6.00E-01            | 1097                     | 7.10E-01              | 908                      |
| ZNF/Rpts        | 194     | 140     | 183                    | 151                    | 2.30E-01            | 199                      | 7.50E-01              | 164                      |
| Inactive region | 18      | 8       | 14                     | 12                     | 2.00E-01            | 19                       | 9.20E-01              | 16                       |
| TssBiv          | 326     | 368     | 380                    | 314                    | <b>2.80E-05</b>     | 325                      | 9.70E-01              | 270                      |
| BivFlnk         | 244     | 363     | 332                    | 275                    | <b>2.10E-13</b>     | 247                      | 8.50E-01              | 207                      |
| EnhBiv          | 379     | 532     | 499                    | 412                    | <b>1.60E-16</b>     | 433                      | <b>7.00E-03</b>       | 361                      |

\*Classification performed by RoadMap Epigenomics

bck: background based on 450K Illumina, cl: Cluster

TssA: Active TSS; TssAFlnk: Flanking Active TSS; TxFlnk: Transcr. at gene 5' and 3'; Tx: Strong transcription; TxWk: W

| p-value<br>(A vs bck) |
|-----------------------|
| 2.40E-04              |
| 1.70E-02              |
| 4.70E-11              |
| 4.80E-14              |
| 1.20E-07              |
| 1.00E-07              |
| 7.20E-01              |
| 5.80E-02              |
| 7.10E-02              |
| 8.50E-10              |
| 1.00E-28              |
| 1.10E-20              |

Weak
