# Supplementary material for: Environmental Influences Measured by Epigenetic Clock and Vulnerability Components at Birth Impact Clinical ASD Heterogeneity
Source: MDPI journal article supplement (doi:10.3390/genes12091433), 2021-09-17
Supplement: s1 [file s1]

Table S2: Summary of descriptive statistics of Groups

| PHENOTYPE                      | Group A |       |       | Group B |       |      | p-value** |
|--------------------------------|---------|-------|-------|---------|-------|------|-----------|
|                                | n       | Mean  | SD    | n       | Mean  | SD   |           |
| Age                            | 29      | 4.90  | 1.40  | 38      | 4.63  | 1.3  | 0.45      |
| CARS                           | 29      | 34.52 | 6.27  | 38      | 38.25 | 6.3  | 0.06      |
| CBCL Internalizing Symptoms    | 29      | 12.03 | 4.75  | 38      | 10.37 | 5.3  | 0.12      |
| CBCL Externalizing Symptoms    | 29      | 14.59 | 8.32  | 38      | 13.47 | 5.9  | 0.77      |
| ADI                            | 26      | 47.42 | 6.95  | 38      | 46.68 | 7.0  | 0.54      |
| IQ                             | 26      | 59.31 | 9.13  | 38      | 58.84 | 8.7  | 0.80      |
| Vineland Total                 | 26      | 48.85 | 7.96  | 38      | 49.97 | 9.3  | 0.95      |
| Vineland Communication         | 27      | 44.81 | 7.30  | 37      | 48.70 | 9.4  | 0.26      |
| Vineland Socialization         | 27      | 53.07 | 9.62  | 37      | 54.16 | 10.6 | 0.77      |
| Vineland Daily Life Activities | 27      | 51.41 | 13.07 | 37      | 49.38 | 12.9 | 0.92      |

\*\* Wilcoxon Mann-Whitney test was performed to Risk Scores and Phenotype measures
