# Supplementary material for: Environmental Influences Measured by Epigenetic Clock and Vulnerability Components at Birth Impact Clinical ASD Heterogeneity
Source: MDPI journal article supplement (doi:10.3390/genes12091433), 2021-09-17
Supplement: s1 [file s1]

Table S5: Enrichment analysis of FEM Genes (GO, KEGG and Phenotype Database)

| MOD    | geneSet    | size | overlap | expect | Ratio  | pValue   | FDR             | Genes (EntrezGene ID)                                              | Function                                  | database               |
|--------|------------|------|---------|--------|--------|----------|-----------------|--------------------------------------------------------------------|-------------------------------------------|------------------------|
| BCL2A1 | GO:2001233 | 385  | 8       | 0.24   | 33.26  | 4.50E-12 | <b>2.94E-09</b> | 578, 597, 599, 638, 5366, 7417, 10018, 90427                       | regulation of apoptotic signaling pathway | GO: Biological Process |
|        | GO:0097193 | 285  | 7       | 0.18   | 39.31  | 6.05E-11 | <b>2.63E-08</b> | 578, 597, 599, 5366, 7417, 10018, 90427                            | intrinsic apoptotic signaling pathway     | GO: Biological Process |
|        | GO:0008637 | 116  | 5       | 0.07   | 68.99  | 4.49E-09 | <b>1.46E-06</b> | 578, 638, 5366, 10018, 90427                                       | apoptotic mitochondrial changes           | GO: Biological Process |
|        | GO:0007006 | 126  | 5       | 0.08   | 63.51  | 6.82E-09 | <b>1.78E-06</b> | 578, 5366, 10018, 55669, 90427                                     | mitochondrial membrane organization       | GO: Biological Process |
|        | GO:0010821 | 176  | 5       | 0.11   | 45.47  | 3.66E-08 | <b>7.96E-06</b> | 578, 638, 5366, 10018, 90427                                       | regulation of mitochondrion organization  | GO: Biological Process |
|        | GO:0038034 | 69   | 4       | 0.04   | 92.78  | 6.51E-08 | <b>1.21E-05</b> | 578, 597, 599, 10018                                               | signal transduction in absence of ligand  | GO: Biological Process |
|        | GO:0097191 | 220  | 5       | 0.14   | 36.38  | 1.12E-07 | <b>1.64E-05</b> | 578, 597, 599, 5366, 10018                                         | extrinsic apoptotic signaling pathway     | GO: Biological Process |
|        | GO:0090559 | 79   | 4       | 0.05   | 81.04  | 1.13E-07 | <b>1.64E-05</b> | 578, 5366, 10018, 90427                                            | regulation of membrane permeability       | GO: Biological Process |
|        | GO:0043254 | 447  | 5       | 0.28   | 17.90  | 3.73E-06 | <b>4.86E-04</b> | 638, 5366, 7417, 10018, 90427                                      | regulation of protein complex assembly    | GO: Biological Process |
|        | GO:0006839 | 237  | 4       | 0.15   | 27.01  | 9.18E-06 | <b>1.09E-03</b> | 578, 5366, 10018, 90427                                            | mitochondrial transport                   | GO: Biological Process |
|        | GO:0007548 | 266  | 4       | 0.17   | 24.07  | 1.45E-05 | <b>1.57E-03</b> | 578, 599, 638, 10018                                               | sex differentiation                       | GO: Biological Process |
|        | GO:0070585 | 137  | 3       | 0.09   | 35.05  | 7.05E-05 | <b>7.07E-03</b> | 5366, 10018, 90427                                                 | protein localization to mitochondrion     | GO: Biological Process |
|        | GO:0061458 | 428  | 4       | 0.27   | 14.96  | 9.32E-05 | <b>8.68E-03</b> | 578, 599, 638, 10018                                               | reproductive system development           | GO: Biological Process |
|        | GO:1902742 | 31   | 2       | 0.02   | 103.26 | 1.62E-04 | <b>1.32E-02</b> | 578, 10018                                                         | apoptotic process involved in development | GO: Biological Process |
|        | GO:0048872 | 245  | 3       | 0.15   | 19.60  | 3.93E-04 | <b>3.01E-02</b> | 578, 5366, 10018                                                   | homeostasis of number of cells            | GO: Biological Process |
|        | GO:0034976 | 268  | 3       | 0.17   | 17.92  | 5.11E-04 | <b>3.70E-02</b> | 578, 5366, 10018                                                   | response to endoplasmic reticulum stress  | GO: Biological Process |
|        | GO:0019867 | 206  | 8       | 0.13   | 62.16  | 2.89E-14 | <b>3.76E-11</b> | 578, 597, 599, 5366, 7417, 10018, 55669, 90427                     | outer membrane                            | GO: Cellular Component |
|        | GO:0046982 | 468  | 4       | 0.29   | 13.68  | 1.32E-04 | <b>1.15E-02</b> | 578, 597, 599, 10018                                               | protein heterodimerization activity       | GO: Molecular Function |
|        | hsa04215   | 33   | 3       | 0.04   | 75.44  | 6.48E-06 | <b>1.83E-03</b> | 10018, 5366, 578                                                   | Apoptosis                                 | KEGG                   |
|        | hsa04210   | 136  | 4       | 0.16   | 24.41  | 1.23E-05 | <b>1.83E-03</b> | 10018, 5366, 578, 597                                              | Apoptosis                                 | KEGG                   |
|        | hsa05210   | 86   | 3       | 0.10   | 28.95  | 1.18E-04 | <b>1.17E-02</b> | 10018, 5366, 578                                                   | Colorectal cancer                         | KEGG                   |
|        | hsa05206   | 299  | 4       | 0.36   | 11.10  | 2.70E-04 | <b>2.01E-02</b> | 10018, 578, 599, 90427                                             | MicroRNAs in cancer                       | KEGG                   |
|        | GO:0002697 | 381  | 13      | 0.48   | 27.31  | 0.00E+00 | <b>0.00E+00</b> | 712, 713, 714, 715, 716, 727, 730, 731, 732, 735, 1191, 1369, 1370 | regulation of immune effector process     | GO: Biological Process |
|        | GO:0050727 | 361  | 13      | 0.45   | 28.82  | 0.00E+00 | <b>0.00E+00</b> | 712, 713, 714, 715, 716, 727, 730, 731, 732, 735, 1191, 1369, 1370 | regulation of inflammatory response       | GO: Biological Process |
|        | GO:0051604 | 322  | 13      | 0.40   | 32.31  | 0.00E+00 | <b>0.00E+00</b> | 712, 713, 714, 715, 716, 727, 730, 731, 732, 735, 1191, 1369, 1370 | protein maturation                        | GO: Biological Process |

|       |            |     |    |      |        |          |                 |                                                                          |                                           |                          |
|-------|------------|-----|----|------|--------|----------|-----------------|--------------------------------------------------------------------------|-------------------------------------------|--------------------------|
| ROBO3 | GO:0006959 | 242 | 14 | 0.30 | 46.30  | 0.00E+00 | <b>0.00E+00</b> | 712, 713, 714, 715, 716, 727, 730, 731, 732, 735, 1191, 1369, 1370, 3273 | humoral immune response                   | GO: Biological Process   |
|       | GO:0002526 | 154 | 13 | 0.19 | 67.55  | 0.00E+00 | <b>0.00E+00</b> | 712, 713, 714, 715, 716, 727, 730, 731, 732, 735, 1191, 1369, 1370       | acute inflammatory response               | GO: Biological Process   |
|       | GO:0072376 | 92  | 13 | 0.11 | 113.08 | 0.00E+00 | <b>0.00E+00</b> | 712, 713, 714, 715, 716, 727, 730, 731, 732, 735, 1191, 1369, 1370       | protein activation cascade                | GO: Biological Process   |
|       | GO:0002449 | 238 | 11 | 0.30 | 36.99  | 8.88E-16 | <b>1.45E-13</b> | 712, 713, 714, 715, 716, 727, 730, 731, 732, 735, 1191                   | lymphocyte mediated immunity              | GO: Biological Process   |
|       | GO:0002250 | 382 | 11 | 0.48 | 23.04  | 1.72E-13 | <b>2.49E-11</b> | 712, 713, 714, 715, 716, 727, 730, 731, 732, 735, 1191                   | adaptive immune response                  | GO: Biological Process   |
|       | GO:0019835 | 40  | 6  | 0.05 | 120.04 | 6.22E-12 | <b>8.11E-10</b> | 727, 730, 731, 732, 735, 3273                                            | cytolysis                                 | GO: Biological Process   |
|       | GO:0072562 | 108 | 11 | 0.13 | 81.51  | 0.00E+00 | <b>0.00E+00</b> | 713, 714, 715, 716, 731, 735, 1191, 1356, 1370, 3273, 5444               | blood microparticle                       | GO: Cellular Component   |
|       | GO:0031012 | 496 | 7  | 0.62 | 11.29  | 1.44E-06 | <b>1.70E-04</b> | 712, 713, 714, 1191, 1370, 3273, 64386                                   | extracellular matrix                      | GO: Cellular Component   |
|       | GO:0005581 | 87  | 3  | 0.11 | 27.59  | 1.65E-04 | <b>1.54E-02</b> | 712, 713, 714                                                            | collagen trimer                           | GO: Cellular Component   |
|       | GO:0017171 | 208 | 5  | 0.26 | 19.24  | 4.67E-06 | <b>5.08E-04</b> | 712, 713, 714, 715, 716                                                  | serine hydrolase activity                 | GO: Molecular Function   |
|       | GO:0004175 | 436 | 6  | 0.54 | 11.01  | 1.11E-05 | <b>1.11E-03</b> | 712, 713, 714, 715, 716, 64386                                           | endopeptidase activity                    | GO: Molecular Function   |
|       | hsa04610   | 79  | 11 | 0.15 | 74.28  | 0.00E+00 | <b>0.00E+00</b> | 1191, 712, 713, 714, 715, 716, 727, 730, 731, 732, 735                   | Complement and coagulation cascades       | KEGG                     |
|       | hsa05020   | 35  | 8  | 0.07 | 121.94 | 2.22E-16 | <b>3.30E-14</b> | 712, 713, 714, 727, 730, 731, 732, 735                                   | Prion diseases                            | KEGG                     |
|       | hsa05322   | 133 | 10 | 0.25 | 40.11  | 2.22E-15 | <b>2.20E-13</b> | 712, 713, 714, 715, 716, 727, 730, 731, 732, 735                         | Systemic lupus erythematosus              | KEGG                     |
|       | hsa05150   | 56  | 6  | 0.10 | 57.16  | 3.87E-10 | <b>2.87E-08</b> | 712, 713, 714, 715, 716, 727                                             | Staphylococcus aureus infection           | KEGG                     |
|       | hsa05133   | 76  | 6  | 0.14 | 42.12  | 2.56E-09 | <b>1.52E-07</b> | 712, 713, 714, 715, 716, 727                                             | Pertussis                                 | KEGG                     |
|       | hsa05146   | 96  | 3  | 0.18 | 16.67  | 6.76E-04 | <b>3.35E-02</b> | 731, 732, 735                                                            | Amoebiasis                                | KEGG                     |
|       | hsa05142   | 102 | 3  | 0.19 | 15.69  | 8.07E-04 | <b>3.42E-02</b> | 712, 713, 714                                                            | Chagas disease (American trypanosomiasis) | KEGG                     |
|       | HP:0005339 | 23  | 10 | 0.09 | 113.77 | 0.00E+00 | <b>0.00E+00</b> | 712, 713, 714, 715, 716, 727, 730, 731, 732, 735                         | Abnormality of complement system          | Human Phenotype Ontology |
|       | HP:0004431 | 20  | 9  | 0.08 | 117.75 | 0.00E+00 | <b>0.00E+00</b> | 731, 732, 712, 713, 714, 715, 727, 730, 735                              | Complement deficiency                     | Human Phenotype Ontology |

|        |            |     |    |      |       |          |                 |                                                  |                                                             |                          |
|--------|------------|-----|----|------|-------|----------|-----------------|--------------------------------------------------|-------------------------------------------------------------|--------------------------|
|        | HP:0005368 | 182 | 10 | 0.70 | 14.38 | 8.85E-11 | <b>6.92E-08</b> | 712, 713, 714, 715, 716, 727, 730, 731, 732, 735 | Abnormality of humoral immunity                             | Human Phenotype Ontology |
|        | HP:0002960 | 117 | 6  | 0.45 | 13.42 | 2.48E-06 | <b>1.45E-03</b> | 712, 713, 714, 715, 716, 731                     | Autoimmunity                                                | Human Phenotype Ontology |
|        | HP:0000123 | 33  | 4  | 0.13 | 31.72 | 5.30E-06 | <b>2.49E-03</b> | 712, 713, 714, 715                               | Nephritis                                                   | Human Phenotype Ontology |
| UNC119 | GO:0031109 | 108 | 3  | 0.23 | 13.08 | 1.54E-03 | 3.34E-01        | 402, 1070, 6904                                  | microtubule polymerization or depolymerization              | GO: Biological Process   |
|        | GO:0006399 | 183 | 3  | 0.39 | 7.72  | 6.78E-03 | 1.00E+00        | 1787, 5464, 81890                                | tRNA metabolic process                                      | GO: Biological Process   |
|        | GO:0006457 | 210 | 3  | 0.45 | 6.72  | 9.88E-03 | 1.00E+00        | 6903, 6904, 6905                                 | protein folding                                             | GO: Biological Process   |
|        | GO:0016328 | 56  | 3  | 0.12 | 25.22 | 2.25E-04 | 2.93E-01        | 402, 6904, 7976                                  | lateral plasma membrane                                     | GO: Cellular Component   |
|        | GO:0031970 | 87  | 3  | 0.18 | 16.23 | 8.22E-04 | 3.34E-01        | 402, 10063, 23568                                | organelle envelope lumen                                    | GO: Cellular Component   |
|        | GO:0005874 | 402 | 5  | 0.85 | 5.85  | 1.49E-03 | 3.34E-01        | 6903, 6904, 6905, 27436, 84056                   | microtubule                                                 | GO: Cellular Component   |
|        | GO:0045171 | 59  | 2  | 0.13 | 15.96 | 6.95E-03 | 1.00E+00        | 2948, 9094                                       | intercellular bridge                                        | GO: Cellular Component   |
|        | GO:0015631 | 321 | 5  | 0.68 | 7.33  | 5.43E-04 | 3.34E-01        | 1070, 6903, 6904, 27436, 84056                   | tubulin binding                                             | GO: Molecular Function   |
|        | GO:0051087 | 100 | 3  | 0.21 | 14.12 | 1.23E-03 | 3.34E-01        | 6903, 6904, 6905                                 | chaperone binding                                           | GO: Molecular Function   |
|        | GO:0016782 | 70  | 2  | 0.15 | 13.45 | 9.66E-03 | 1.00E+00        | 6783, 6820                                       | transferase activity, transferring sulfur-containing groups | GO: Molecular Function   |
|        | hsa05225   | 168 | 3  | 0.31 | 9.53  | 3.39E-03 | 8.06E-01        | 2948, 55274, 7976                                | Hepatocellular carcinoma                                    | KEGG                     |
|        | hsa00140   | 60  | 2  | 0.11 | 17.78 | 5.43E-03 | 8.06E-01        | 6783, 6820                                       | Steroid hormone biosynthesis                                | KEGG                     |
|        | hsa05166   | 255 | 3  | 0.48 | 6.28  | 1.08E-02 | 1.00E+00        | 1031, 3117, 7976                                 | Human T-cell leukemia virus 1 infection                     | KEGG                     |
|        | hsa00190   | 133 | 2  | 0.25 | 8.02  | 2.49E-02 | 1.00E+00        | 10063, 5464                                      | Oxidative phosphorylation                                   | KEGG                     |
|        | hsa04390   | 154 | 2  | 0.29 | 6.93  | 3.27E-02 | 1.00E+00        | 5522, 7976                                       | Hippo signaling pathway                                     | KEGG                     |
|        | hsa04934   | 154 | 2  | 0.29 | 6.93  | 3.27E-02 | 1.00E+00        | 1031, 7976                                       | Cushing syndrome                                            | KEGG                     |
|        | hsa05310   | 31  | 1  | 0.06 | 17.21 | 5.66E-02 | 1.00E+00        | 3117                                             | Asthma                                                      | KEGG                     |
|        | hsa05330   | 38  | 1  | 0.07 | 14.04 | 6.90E-02 | 1.00E+00        | 3117                                             | Allograft rejection                                         | KEGG                     |
|        | hsa05332   | 41  | 1  | 0.08 | 13.01 | 7.42E-02 | 1.00E+00        | 3117                                             | Graft-versus-host disease                                   | KEGG                     |
|        | hsa04940   | 43  | 1  | 0.08 | 12.41 | 7.77E-02 | 1.00E+00        | 3117                                             | Type I diabetes mellitus                                    | KEGG                     |
|        | HP:0002717 | 33  | 2  | 0.07 | 29.73 | 1.86E-03 | 1.00E+00        | 7809, 1031                                       | Adrenal overactivity                                        | Human Phenotype Ontology |

|            |     |   |      |       |          |          |                   |                                               |                             |
|------------|-----|---|------|-------|----------|----------|-------------------|-----------------------------------------------|-----------------------------|
| HP:0006829 | 60  | 2 | 0.12 | 16.35 | 6.07E-03 | 1.00E+00 | 6904, 6905        | Severe muscular hypotonia                     | Human Phenotype<br>Ontology |
| HP:0011767 | 60  | 2 | 0.12 | 16.35 | 6.07E-03 | 1.00E+00 | 1031, 6905        | Abnormality of the parathyroid physiology     | Human Phenotype<br>Ontology |
| HP:0002510 | 62  | 2 | 0.13 | 15.83 | 6.47E-03 | 1.00E+00 | 6904, 6905        | Spastic tetraplegia                           | Human Phenotype<br>Ontology |
| HP:0000828 | 67  | 2 | 0.14 | 14.65 | 7.52E-03 | 1.00E+00 | 1031, 6905        | Abnormality of the parathyroid gland          | Human Phenotype<br>Ontology |
| HP:0010929 | 217 | 3 | 0.44 | 6.78  | 7.59E-03 | 1.00E+00 | 1031, 6905, 7809  | Abnormality of cation homeostasis             | Human Phenotype<br>Ontology |
| HP:0003111 | 241 | 3 | 0.49 | 6.11  | 1.02E-02 | 1.00E+00 | 1031, 6905, 7809  | Abnormality of ion homeostasis                | Human Phenotype<br>Ontology |
| HP:0040077 | 91  | 2 | 0.19 | 10.78 | 1.36E-02 | 1.00E+00 | 1031, 6905        | Abnormal concentration of calcium in<br>blood | Human Phenotype<br>Ontology |
| HP:0010783 | 101 | 2 | 0.21 | 9.72  | 1.66E-02 | 1.00E+00 | 1031, 6820        | Erythema                                      | Human Phenotype<br>Ontology |
| HP:0003117 | 316 | 3 | 0.64 | 4.66  | 2.13E-02 | 1.00E+00 | 1031, 23568, 6905 | Abnormality of circulating hormone level      | Human Phenotype<br>Ontology |

---
