# Supplementary material for: Environmental Influences Measured by Epigenetic Clock and Vulnerability Components at Birth Impact Clinical ASD Heterogeneity
Source: Genes (Basel). 2021 Sep 17;12(9):1433. doi: 10.3390/genes12091433 (PMC8467464; doi:10.3390/genes12091433)
Supplement: Supplementary file 1 [file genes-12-01433-s001.zip]

Archive with 6 entries (6 files):
- Figure S1.pdf
- TableS1.pdf
- TableS2.pdf
- TableS3.pdf
- TableS4.pdf
- TableS5.pdf
